1 **Reproducible Coactivation Patterns of Functional Brain Networks Reveal the Aberrant**  
2 **Dynamic State Transition in Schizophrenia**

3

4 Hang Yang<sup>1</sup>, Hong Zhang<sup>1</sup>, Xin Di<sup>1,2</sup>, Shuai Wang<sup>3</sup>, Chun Meng<sup>1\*</sup>, Lin Tian<sup>3\*</sup>, Bharat  
5 Biswal<sup>1,2\*</sup>

6

7 <sup>1</sup> The Clinical Hospital of Chengdu Brain Science Institute, MOE Key Laboratory for  
8 Neuroinformation, Center for Information in Medicine, School of Life Science and  
9 Technology, University of Electronic Science and Technology of China, Chengdu 611731,  
10 China.

11 <sup>2</sup> Department of Biomedical Engineering, New Jersey Institute of Technology, Newark, NJ,  
12 07102, USA.

13 <sup>3</sup> Department of Psychiatry, The Affiliated Wuxi Mental Health Center of Nanjing Medical  
14 University, Wuxi 214151, China

15

16 **\* Correspondence:**

17 Dr. Chun Meng, The Clinical Hospital of Chengdu Brain Science Institute, MOE Key  
18 Laboratory for Neuroinformation, Center for Information in Medicine, School of Life Science  
19 and Technology, University of Electronic Science and Technology of China, No. 2006,  
20 Xiyuan Avenue, Chengdu 611731, China; E-mail: [chunmeng@uestc.edu.cn](mailto:chunmeng@uestc.edu.cn)

21 Dr. Lin Tian, Department of Psychiatry, The Affiliated Wuxi Mental Health Center of  
22 Nanjing Medical University, No. 156 Qianhu Road, Binhu District, Wuxi 214151, China; E-  
23 mail: [tianz@njmu.edu.cn](mailto:tianz@njmu.edu.cn)

24 Dr. Bharat B. Biswal, 607 Fenster Hall, University Height, Newark, NJ, 07102, USA; E-  
25 mail: [bbiswal@yahoo.com](mailto:bbiswal@yahoo.com)

26

27 **Highlights:**

- 28 1. Three coactivation patterns (CAPs) pairs with opposite coactivation profiles were  
29 identified, and the between-state transition probability was positively correlated with their  
30 spatial similarity.
- 31 2. Good spatial and temporal reproducibility and generalizability of CAPs were achieved  
32 under varied analytic methods and independent cohorts.
- 33 3. Schizophrenia patients showed altered temporal dynamics not only within the triple-  
34 network but also other primary and higher-order networks.

35

36 **Abstract**

37 It is well documented that massive dynamic information is contained in the resting-state  
38 fMRI. Recent studies have identified recurring states dominated by similar coactivation  
39 patterns (CAP) and revealed their temporal dynamics. However, the reproducibility and  
40 generalizability of the CAP analysis is unclear. To address this question, the effects of  
41 methodological pipelines on CAP are comprehensively evaluated in this study, including  
42 preprocessing, network construction, cluster number and three independent cohorts. The CAP  
43 state dynamics are characterized by fraction of time, persistence, counts, and transition  
44 probability. Results demonstrate six reliable CAP states and their dynamic characteristics are  
45 also reproducible. The state transition probability is found to be positively associated with the  
46 spatial similarity. Furthermore, the aberrant CAP in schizophrenia has been investigated by  
47 using the reproducible method on three cohorts. Schizophrenia patients spend less time in  
48 CAP states that involve the fronto-parietal network, but more time in CAP states that involve  
49 the default mode and salience network. The aberrant dynamic characteristics of CAP are  
50 correlated with the symptom severity. These results reveal the reproducibility and  
51 generalizability of the CAP analysis, which can provide novel insights into the  
52 neuropathological mechanism associated with aberrant brain network dynamics of  
53 schizophrenia.

54

55 **Keywords:** coactivation patterns, dynamics, reproducibility, schizophrenia, triple-network

56

## 57 **1. Introduction**

58 Since the resting-state fMRI was confirmed to be physiologically meaningful,(B. Biswal  
59 et al., 1995) a number of resting-state fMRI studies have emerged, of which functional  
60 connectivity (FC) is one popular method to detect the remote functional co-fluctuations (B. B.  
61 Biswal et al., 2010; Friston, 2011). Previous functional connectivity methods have typically  
62 assumed stationarity that the time series do not change their characteristics over time.  
63 However, the brain is indeed a complex system featured by the dynamic functional brain  
64 connectome (Zalesky et al., 2014). Recent evidence suggests that functional interactions  
65 between different brain regions and networks vary with time. The sliding-window based  
66 dynamic functional connectivity (dFC) is intensively used to measure the dynamic interaction  
67 between two regions (Hutchison et al., 2013; Preti et al., 2017), which has been shown to link  
68 with individual differences (Fong et al., 2019), task performances and disease alterations  
69 (Gonzalez-Castillo & Bandettini, 2018).

70 Despite the limitation of the sliding-window approach, the dynamic characteristics of the  
71 functional brain connectome at the macroscopic level support that the brain has multiple  
72 functional recurring states (Zalesky et al., 2014). There are several methods for dynamic brain  
73 state detection. Combining the sliding-window dFC with the clustering method, Allen and  
74 colleagues identified several FC states, as an intermediate scale between static and instant FC  
75 underlying small short-time tasks, which can reallocate and integrate attentional and executive  
76 resources (Allen et al., 2014). Besides, based on the assumption of temporal independence,  
77 Smith and colleagues used temporal ICA to identify temporal function modes (TFM), which  
78 represent unique brain activation patterns (Smith et al., 2012). Different from the dFC-  
79 clustering and TFM which assign each time point to one single state, the approach of the  
80 hidden Markov model (HMM) could identify a mixture of the brain states with a given  
81 probability at each time point, by assuming the transitions between states should follow a  
82 Markov process (Vidaurre et al., 2016). Vidaurre et al. used HMM in resting-state fMRI, and  
83 they found two hierarchical metastates that represent higher-order cognition and sensorimotor  
84 systems (Vidaurre et al., 2017).

85 The coactivation pattern (CAP) analysis is a data-driven method to detect the functional  
86 brain states in a single volume level (Liu et al., 2013; Liu & Duyn, 2013), which originates  
87 from the point process analysis (Tagliazucchi et al., 2012). Rather than capturing the dFC  
88 configurations as brain states, it is simple and straightforward that, for each frame of the data,  
89 the spatial coactivation patterns represent a specific whole-brain activation configuration to  
90 deal with the real-time task at that time, and that different frames which share the same spatial

91 patterns are regarded as the same CAP state (Figure 1A). As a data-driven method, CAP  
92 analysis relies on very few mathematical presumptions, and is free of the confounding  
93 influence from the sliding window length. Therefore, CAP analysis has increasingly been  
94 used to study the abnormal network dynamics in depression (Kaiser et al., 2019), Alzheimer's  
95 disease (Kaiser et al., 2019; Ma et al., 2020) and task fMRI (Freitas et al., 2020).

96 The reproducibility is crucial for analytical methods in fMRI studies (Botvinik-Nezer et  
97 al., 2020; Eklund et al., 2016; Zuo et al., 2019). A lot of analytic flexibility exists in fMRI  
98 studies (Vergara et al., 2017), such as different preprocessing pipelines (Shirer et al., 2015),  
99 different software and toolboxes (Bowring et al., 2019). It is necessary to clarify the effects of  
100 varied settings in neuroimaging analyses (Aurich et al., 2015; Strother, 2006; Vergara et al.,  
101 2017) and to establish a standard and robust methodological pipeline (Esteban et al., 2019).  
102 However, it still remains unknown about the analytic flexibility and reproducibility for CAP  
103 analysis.

104 Schizophrenia is a psychiatric disorder with complex structural and functional brain  
105 alterations, characterized by abnormal connectome and functional dynamics (Collin et al.,  
106 2016; Fornito et al., 2012; Hunt et al., 2017). Particularly, the triple-network (V. Menon,  
107 2011), including the default-mode network (DMN), fronto-parietal network central (FPN) or  
108 executive network (CEN), and salience network (SN), is postulated as a critical core of  
109 network dysfunction for understanding the neuropathological mechanism of psychiatric  
110 disorders including schizophrenia (Manoliu et al., 2014; V. Menon, 2011). Recently, Supekar  
111 and colleagues found that reduced dynamic interactions among the SN, CEN and DMN may  
112 substrate neurobiological signatures of schizophrenia (Supekar et al., 2019). However, little is  
113 known about the aberrant dynamic characteristics in schizophrenia concerning triple networks  
114 as well as other parts of the whole brain.

115 This study aimed to first investigate the reproducibility and generalizability of the CAP,  
116 and then utilize the robust analytical approach to study the aberrant dynamic state transition in  
117 schizophrenia. To achieve this goal, key methodological aspects were carefully evaluated for  
118 the robustness of CAP, including different preprocessing pipelines, ROI numbers for network  
119 construction, cluster numbers, and cohorts. Then, reliable dynamic states in the functional  
120 brain coactivation patterns were identified and further employed to compare the temporal  
121 dynamic characteristics between schizophrenia patients (SZ) and healthy controls (HC) in  
122 three independent data cohorts. Next, the associations between aberrant dynamic state  
123 transition and clinical symptom severity were explored.

124

## 125 **2. Materials and Methods**

### 126 **2.1 Participants**

127 To explore the reproducibility and generalizability of this study, three cohorts (WuXi,  
128 COBRE and UCLA) were analyzed. The WuXi cohort was used as the primary cohort, the  
129 other two open-access cohorts were treated as verification and their detailed participant  
130 information was described in the Supplementary material.

131 For the primary cohort (WuXi), all subjects were scanned by a structural MRI and  
132 resting-state functional MRI on a 3.0-Tesla Magnetom TIM Trio (Siemens Medical System) at  
133 the Department of Medical Imaging, Wuxi People's Hospital, Nanjing Medical University.  
134 Foam pads were used to reduce head motion and scanner noise. Before the scan, the subjects  
135 were instructed to keep their eyes closed, relax but not fall asleep, and move as little as  
136 possible during data acquisition. After excluding subjects with large head motion, 69 SZ  
137 subjects and 97 HC subjects remained for the current study. Positive and Negative Syndrome  
138 Scale (PANSS) was used to measure the psychiatric symptoms of SZ patients.

139 Framewise displacement (FD) was calculated from the resting-state fMRI data to  
140 measure head motion (Di & Biswal, 2015). Subjects were excluded if their maximum  
141 translation or rotation FD were greater than 2 mm or 2°. The k-means clustering was  
142 performed in all 97 HC subjects. For the group comparisons between SZ and HC, only age-  
143 and gender-matched HC subjects were analyzed. The age- and gender-matched demographic  
144 information for the three cohorts were provided in Table 1. The information for all HC  
145 subjects used in the coactivation patterns generation can be found in the Supplementary  
146 material.

147

### 148 **2.2 fMRI Data Acquisition**

149 for the primary cohort (WuXi), the resting-state scans were acquired using a single-shot  
150 gradient-echo echo-planar-imaging sequence (Tian et al., 2016) with the following  
151 parameters: TR = 2000 ms, TE = 30 ms, slice number = 33, slice thickness = 4 mm, flip  
152 angle = 90°, matrix size = 64 × 64, FOV = 220 mm, voxel size = 3.4 × 3.4 × 4 mm<sup>3</sup>, and volume  
153 number = 240. Three-dimensional T1-weighted images were acquired by employing a 3D-  
154 MPRAGE sequence with the following parameters: TR = 2530 ms, TE = 3.44 ms, flip  
155 angle = 7°, matrix size = 256 × 256, slice number = 192, slice thickness = 1 mm,  
156 FOV = 256 mm, and voxel size = 1 × 1 × 1 mm<sup>3</sup>. The fMRI data acquisition parameters for the  
157 other two cohorts were described in the Supplementary material.

158

## 159 **2.3 fMRI Data Preprocessing**

160 The resting-state fMRI data were preprocessed using DPABI (<http://rfmri.org/dpabi>), and  
161 the preprocessing steps were followed: 1) Remove the first 2 time points for the UCLA and  
162 COBRE dataset, and remove the first 5 time points for the WuXi cohort; 2) Realignment; 3)  
163 Coregistration of T1 image to functional image; 4) T1 segmentation by DARTEL; 5)  
164 Normalization of the functional images by T1 DARTEL; 6) Nuisance regression, including 24  
165 head motion parameters, mean white matter (WM) and mean cerebrospinal fluid (CSF) signal,  
166 both with and without global signal regression (GSR); 7) Detrend; 8) Band-pass filtering,  
167 from 0.01 ~ 0.08 Hz; 9) Smoothing with an 8 mm FWHM kernel.

168 To evaluate the effect of preprocessing steps, the resting-state fMRI data was also  
169 preprocessed using a standard task fMRI data preprocessing pipeline, which is similar to the  
170 above steps but without nuisance regression and filtering.

171 The BOLD signal for the preprocessed resting-state fMRI data was extracted from 408  
172 ROIs separately. The 408 ROIs were consist of 400 cortical regions from Yeo's 7 network  
173 parcellation (Schaefer et al., 2018) and 8 subcortical regions (bilateral caudate nucleus,  
174 putamen, globus pallidus and amygdala) from the AAL template (Tzourio-Mazoyer et al.,  
175 2002). The 400 cortical regions are allocated to 7 networks including the visual network  
176 (VN), somatomotor network (SMN), dorsal attention network (DAN), ventral attention  
177 network (VAN), limbic network, fronto-parietal network (FPN) and default mode network  
178 (DMN) (Yeo et al., 2011). The 7 networks have parcellations with different spatial scales from  
179 100 to 1000, and 400 was mainly used in this study because the average voxel size for the 400  
180 ROIs is comparable to the average voxel size of the 8 subcortical regions from the AAL  
181 template.

182

## 183 **2.4 Coactivation Pattern Analysis**

184 Coactivation pattern (CAP) analysis is a data-driven method that identifies recurring  
185 states across time points with similar whole-brain coactivation patterns. In this study, the CAP  
186 analysis was performed using home-made scripts in MATLAB  
187 (<https://www.mathworks.com/>).

188 First, to represent the relative activation magnitude changes in the 408 ROIs, each time  
189 series were normalized using a z-score. For each subject  $i$ , a two-dimensional normalized  
190 BOLD matrix  $X_i (T \times 408)$  was obtained, where  $T$  is the number of time points and 408 is the  
191 ROI number.

192 Next, all HC subjects' normalized BOLD metrics  $X_{HC\_i}(T \times 408)$  were concatenated to  
193 obtain the  $X_{HC}(T_{HC} \times 408, T_{HC} = T \times N)$ , where  $N$  is the sample size of all HC subjects. Then,  
194 k-means clustering was performed to identify similar coactivation patterns across all volumes  
195 from all HC subjects, and the distance between two volumes was calculated by subtracting  
196 their Pearson correlation coefficient from one. The cluster number  $K$  was selected from 2 to  
197 21 with a step length of 1. The clustering algorithm was repeated 100 times with a new initial  
198 cluster centroid for each  $K$  value, and the results with the lowest within-cluster sums of point-  
199 to-centroid distances were used. Frames assigned to the same CAP state were averaged and  
200 divided by the within-cluster standard deviation to generate the normalized CAP maps (Z-  
201 maps) at the group level (Figure 1A).

202 The clustering patterns obtained from all HC subjects were then applied to each SZ  
203 subject. Specifically, each frame from the  $X_{SZ\_i}(T \times 408)$  was extracted, which is a  $1 \times 408$   
204 vector representing the whole-brain coactivation level at that time point. Then, the spatial  
205 similarity between each frame and each normalized CAP map was calculated using the  
206 Pearson correlation, and the frame was assigned to the CAP with the largest spatial similarity.

207 The silhouette score (Rousseeuw, 1987) was calculated to evaluate the clustering results  
208 for different  $K$  values. As shown in Figure S1, Supplementary material, the silhouette score  
209 was monotonically decreasing with the increase of  $K$ . Then, the elbow criterion was  
210 considered to determine the number of clusters. While one issue is that the time points of the  
211 three cohorts are limited, if the cluster number is too large, then each CAP state would only  
212 account for a few seconds through the entire scan. Therefore, 6 clusters were mainly analyzed  
213 and reported in the manuscript as a trade-off, and one recent paper also used 6 clusters for the  
214 CAP analysis (Zhang et al., 2020).

215

## 216 **2.5 State Temporal Dynamics Measures / CAP Metrics:**

217 To evaluate the dynamic properties within and between CAP states, four dynamic  
218 measures (CAP metrics) were calculated at the individual level: 1) **Fraction of time** is  
219 defined as the proportion of total volumes spent in one CAP state over the whole time series;  
220 2) **Persistence** is the average time spent in one state before transferring to another state, and it  
221 describes the mean volume-to-volume maintenance of one CAP state; 3) **Number of states**  
222 **(Counts)** is how many times one state occurred during the whole scan; and 4) **Transition**  
223 **probability matrix** is the probability that one volume within State A transfers to the next  
224 volume belonging to State B, with a non-zero diagonal as the volume within State A could  
225 still stay within State A for the next volume.

226

## 227 **2.6 Transition Probability and Spatial Similarity between States**

228 The relationship between the spatial similarity and transition probability between two  
229 states was measured in all HC subjects. The spatial similarity between different brain states  
230 was calculated using the Pearson correlation. Before measuring the relationship between the  
231 two metrics, the symmetry of the transition probability was first examined. In detail, the  
232 transition probability from State A to State B was paired with the transition probability from  
233 State B to State A, and the Pearson correlation was calculated between all pairs to test the  
234 symmetry level. The transition probability metrics were then averaged on the group level and  
235 symmetrized. Finally, the relationship between the spatial similarity and transition probability  
236 was measured using the Pearson correlation. The diagonal values were not analyzed in this  
237 part.

238

## 239 **2.7 Reproducibility Analysis**

240 Recently, neuroimaging studies have drawn more attention to reproducibility. In this  
241 study, the CAPs' spatial and temporal reproducibility were considered from four aspects. The  
242 first aspect is to consider the effects of different data preprocessing steps, including two  
243 standard resting-state fMRI preprocessing pipelines (with and without GSR) and one classic  
244 task fMRI preprocessing pipeline. Then, the effects of different spatial resolutions of the  
245 template were assessed. In detail, 100, 200, 400 and 1000 ROIs from Yeo's 7 network  
246 parcellations (Schaefer et al., 2018) plus the 8 subcortical regions from the AAL atlas  
247 (Tzourio-Mazoyer et al., 2002) were tested. Different K values were also compared to see  
248 whether the CAP states gradually change with the increase of cluster number. Finally, the  
249 CAP analysis was performed in three independent cohorts separately to detect the site effect.

250 Furthermore, to verify the generalizability of this study, whether the results obtained by  
251 one cohort can be directly replicated in other cohorts, we applied the CAPs generated from  
252 the WuXi cohort to the other two cohorts, then the spatial maps and temporal dynamics  
253 among CAP states were compared.

254 The spatial reproducibility was assessed by calculating the Pearson correlations between  
255 CAPs' spatial maps under different conditions, and the temporal dynamics were then  
256 compared between spatial matched CAPs.

257

## 258 **2.8 Statistical Analysis**



259 For group comparisons, only age- and gender-matched HC and SZ subjects were  
 260 analyzed. Age was compared between SZ and HC by a two-sample t-test, and a chi-square  
 261 cross-table test was used to test the gender difference. As for the CAP metrics, two-sample t-  
 262 tests were performed with age and gender as covariates. FDR correction ( $q = 0.05$ ) was used  
 263 to correct for the multiple comparisons.

264 The relationship between CAP metrics and behavioral measures, such as disease  
 265 symptoms and disease duration, were tested using partial correlation with age and gender as  
 266 covariates. The state temporal dynamics and behavioral measures were first normalized using  
 267 z-score, and subjects with large deviation ( $Z > 3$ ) were excluded in the correlation analysis as  
 268 the outlier. FDR correction ( $q = 0.05$ ) was used to correct for the multiple comparisons.

### 270 3. Results

#### 271 3.1. Demographics and Questionnaires

272 No group differences of age or gender were found between the SZ and HC in all three  
 273 cohorts, and the detailed group characteristics are given in Table 1.

274  
 275 **Table 1.** The demographic information for the three cohorts

|                               | HC            | SZ            | P value              |
|-------------------------------|---------------|---------------|----------------------|
| <b>WuXi cohort (n = 138)</b>  |               |               |                      |
| Num of subjects               | 69            | 69            |                      |
| Age [years]                   | 45.84 ± 11.89 | 46.06 ± 10.96 | 0.9112 <sup>a)</sup> |
| Gender (Male / Female)        | 35 / 34       | 35 / 34       | 1 <sup>b)</sup>      |
| Disease duration              | -             | 19.84 ± 10.96 | -                    |
| PANSS positive                | -             | 20.06 ± 4.59  | -                    |
| PANSS negative                | -             | 23.78 ± 3.84  | -                    |
| PNASS general                 | -             | 41.67 ± 5.27  | -                    |
| PNASS total                   | -             | 85.51 ± 9.50  | -                    |
| <b>COBRE cohort (n = 108)</b> |               |               |                      |
| Num of subjects               | 54            | 54            |                      |
| Age [years]                   | 37.22 ± 12.48 | 37.80 ± 14.13 | 0.8234 <sup>a)</sup> |
| Gender (Male / Female)        | 43 / 11       | 43 / 11       | 1 <sup>b)</sup>      |
| Disease duration              | -             | 15.19 ± 12.46 | -                    |
| PANSS positive                | -             | 14.13 ± 4.29  | -                    |
| PANSS negative                | -             | 14.46 ± 5.10  | -                    |
| PNASS general                 | -             | 28.57 ± 8.40  | -                    |
| PNASS total                   | -             | 57.17 ± 13.52 | -                    |
| <b>UCLA cohort (n = 90)</b>   |               |               |                      |
| Num of subjects               | 45            | 45            |                      |
| Age [years]                   | 36.73 ± 8.65  | 37.00 ± 8.75  | 0.8973 <sup>a)</sup> |
| Gender (Male / Female)        | 33 / 12       | 33 / 12       | 1 <sup>b)</sup>      |
| BPRS                          | -             | 50.40 ± 14.08 | -                    |
| SAPS                          | -             | 28.89 ± 18.49 | -                    |
| SANS                          | -             | 35.09 ± 18.55 | -                    |

276 Data are expressed as mean ± SD (SD: standard deviation).

277 Abbreviations: BPRS, Brief Psychiatric Rating Scale; SANS, Scale for the Assessment of  
278 Negative Symptoms; SAPS, Scale for the Assessment of Positive Symptoms; PANSS,  
279 Positive and Negative Syndrome Scale.

280 <sup>a)</sup> two-sample t-test; <sup>b)</sup> chi-square cross-table test.

281

### 282 **3.2. Reliable CAP identification and Dynamic Characteristics**

283 This study tested different methodological combinations on three independent data  
284 cohorts, such as preprocessing pipelines, ROI numbers and cluster numbers. Below we  
285 reported the primary results of six reliable CAP states, which are based on the WuXi cohort,  
286 using the resting-state preprocessing with global signal regression (GSR) and 408 ROIs. The  
287 other validation results are provided in the Supplementary material.

288

#### 289 *3.2.1. Coactivation Patterns and Brain States*

290 The coactivation patterns were generated from all HC subjects using temporal k-means  
291 clustering, and six CAP states were finally identified (Figure 1B), after the search for optimal  
292 cluster number (see details in the Supplementary material). Among the six CAP states, brain  
293 regions that belong to the same functional network, such as the default mode network (DMN),  
294 fronto-parietal network (FPN), and salience network (SN), tend to be activated or deactivated  
295 simultaneously. One interesting phenomenon is that the six CAP states were grouped into  
296 three pairs with opposite spatial coactivation patterns. For example, State 1 and 2 grouped  
297 together - State 2 was mainly related with the activated FPN, DMN (without posterior  
298 cingulate cortex and precuneus) and deactivated visual network (VN), while State 1 had the  
299 opposite spatial pattern. Since each CAP state had certain brain networks with relatively  
300 stronger activation or deactivation than the other networks of the whole brain, we found that  
301 not only triple networks but also primary (VN, SMN) and higher-order networks (DAN) were  
302 identified in the dominant CAP states.

303

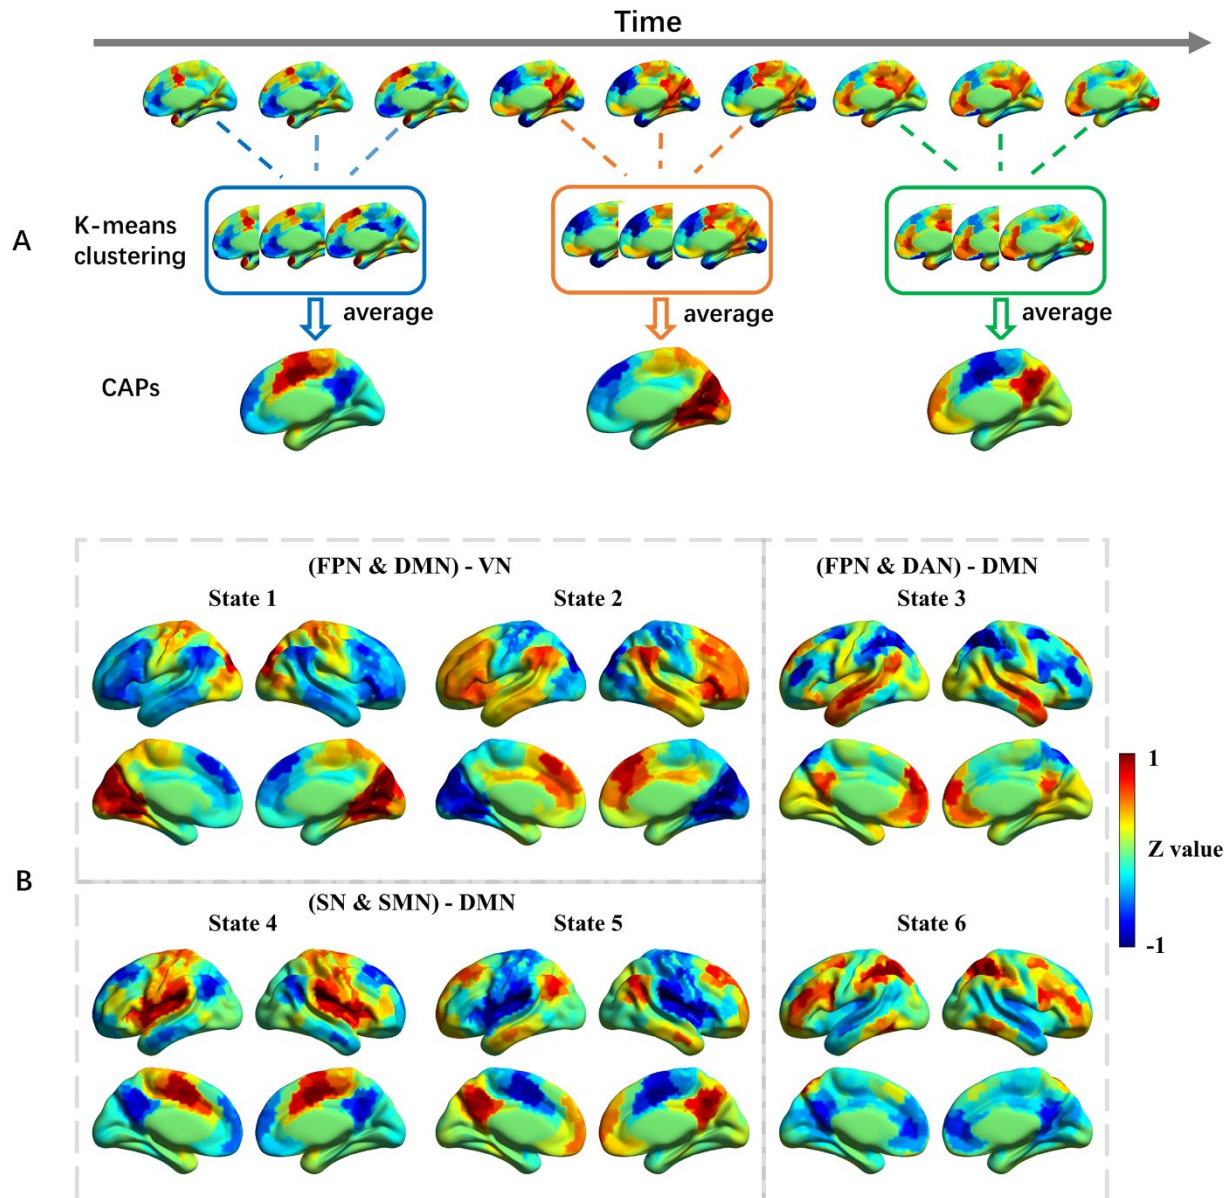

304

305 **Figure 1** A) An illustration for the CAP analysis. The normalized spatial map for each  
306 volume was input for the k-means clustering, to identify volumes with similar coactivation  
307 patterns, and then average them to generate the CAPs. B) Six CAP states were identified by  
308 CAP analysis based on the primary configuration (WuXi cohort, resting-state fMRI  
309 preprocessing with GSR and 408 ROIs for the network construction). These brain states were  
310 normalized at the group level, and the value is the z-statistic value. Red color indicates a  
311 relatively stronger activation, while blue color indicates a relatively stronger deactivation.  
312 State 1 was mainly related to deactivated FPN, DMN and activated VN, and the opposite is  
313 true for State 2; State 3 was mainly characterized by activated DMN and deactivated FPN and  
314 DAN, and the opposite is true for State 6; State 4 was mainly characterized by deactivated  
315 DMN and activated SN and SMN, and the opposite is true for State 5.

316 Abbreviations: DAN, dorsal attention network; DMN, default mode network; FPN, fronto-  
317 parietal network; SN, salience network; SMN, somatomotor network; VN, visual network.

318

### 319 *3.2.2. Transition Probability and Spatial Similarity between States*

320 As shown in the diagonal of the transition probability matrix (Figure 2A), the temporal  
321 activity was dominated by the identified CAP states (more than 60% of the time), and the  
322 between-state alteration remained low transition probability (1% to 11 % of the time).

323 Comparing Figure 2A and Figure 2B, it is clear that the transition probability between brain  
324 states with strong anti-correlated spatial coactivation was close to zero. Taking State 4 and  
325 State 5 for an example (Figure 2C), their coactivation patterns were opposite (spatial  
326 similarity  $r = -0.99$ ), their transition probability from State 4 to State 5 was 0.0081, and from  
327 State 5 to State 4 was 0.0103. Despite the small discrepancy in bi-directional transition  
328 probability, the symmetry in the transition probability matrix is pronounced. Figure 2D  
329 showed a significant positive correlation ( $r = 0.8479$ ,  $p < 0.0001$ ) between the transition  
330 probability from State A to State B and transition probability from State B to State A. Finally,  
331 the relationship between the transition probability and spatial similarity metrics was  
332 evaluated. As shown in Figure 2E, the transition probability between two CAP states was  
333 highly correlated with their spatial similarity ( $r = 0.9817$ ,  $p < 0.0001$ ).

334

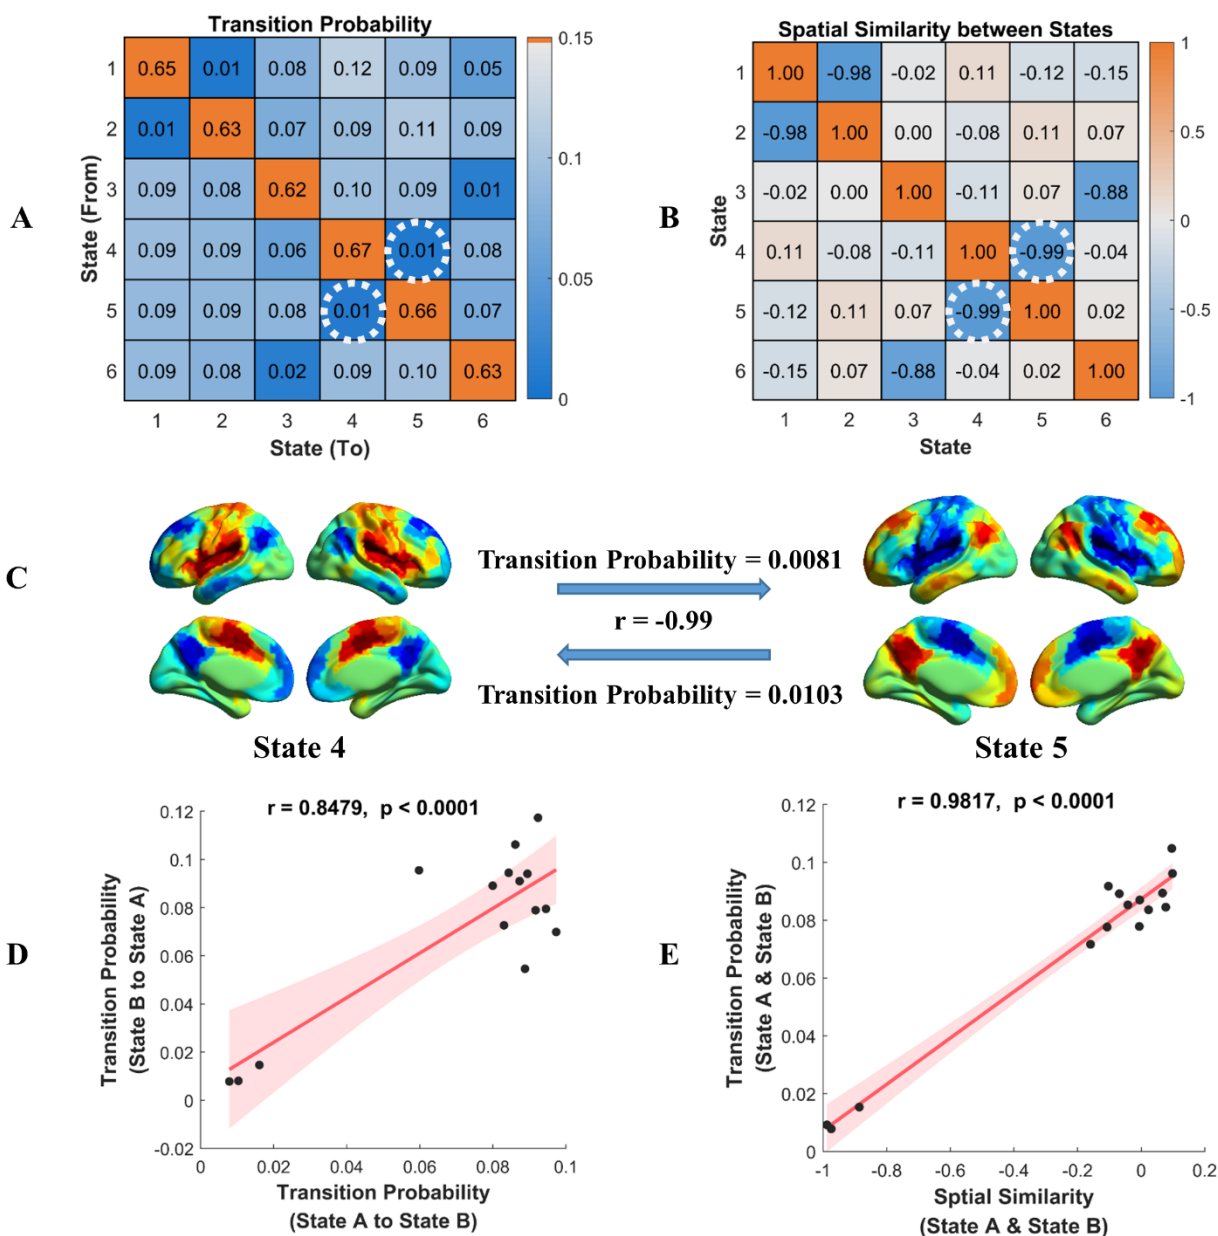

335

336

337

338

339

340

341

342

343

344

345

346

**Figure 2.** The relationship between CAP state transition probability and their spatial similarity. A) The group average transition probability matrix in all HC subjects. B) The spatial similarity between six CAP states, measured by the Pearson correlation. C) The transition probability between State 4 and State 5, and their spatial similarity, the values were shown in the white dashed circles in Figure 2A and Figure 2B. D) The correlation between transition probability from State A to State B and transition probability from State B to State A. The shadow represents the 95% confidence interval. E) The correlation between the symmetrized transition probability between State A and State B and their spatial similarity. The shadow represents the 95% confidence interval.

3.2.3. Spatial Reproducibility Evaluation

347 As shown in Figure 3, each row or column showed two pairs with high spatial similarity,  
 348 which suggest reproducible CAP states and their groups. It indicated that good spatial  
 349 reproducibility within the HC group remained across different preprocessing pipelines and  
 350 ROI numbers for network construction.

351 Moreover, the validation analysis for different cluster number K also demonstrated good  
 352 spatial reproducibility, although more CAP states were separated with the increase of K. For  
 353 example, as shown in Figure 6, when K increased from 6 to 8, four states (State 3 to State 6)  
 354 remained unchanged, their one-to-one correspondence spatial similarity was larger than 0.9,  
 355 and the other two states (State 1 and State 2) were subdivided into four states.

356 To evaluate the reproducibility and generalizability of identified CAP states, the  
 357 clustering results from the WuXi cohort were applied to all subjects from the COBRE cohort  
 358 and UCLA cohort. The diagonal of metrics in Figure 7A showed the high spatial similarity of  
 359 each CAP state between the WuXi cohort and the other two cohorts.

360

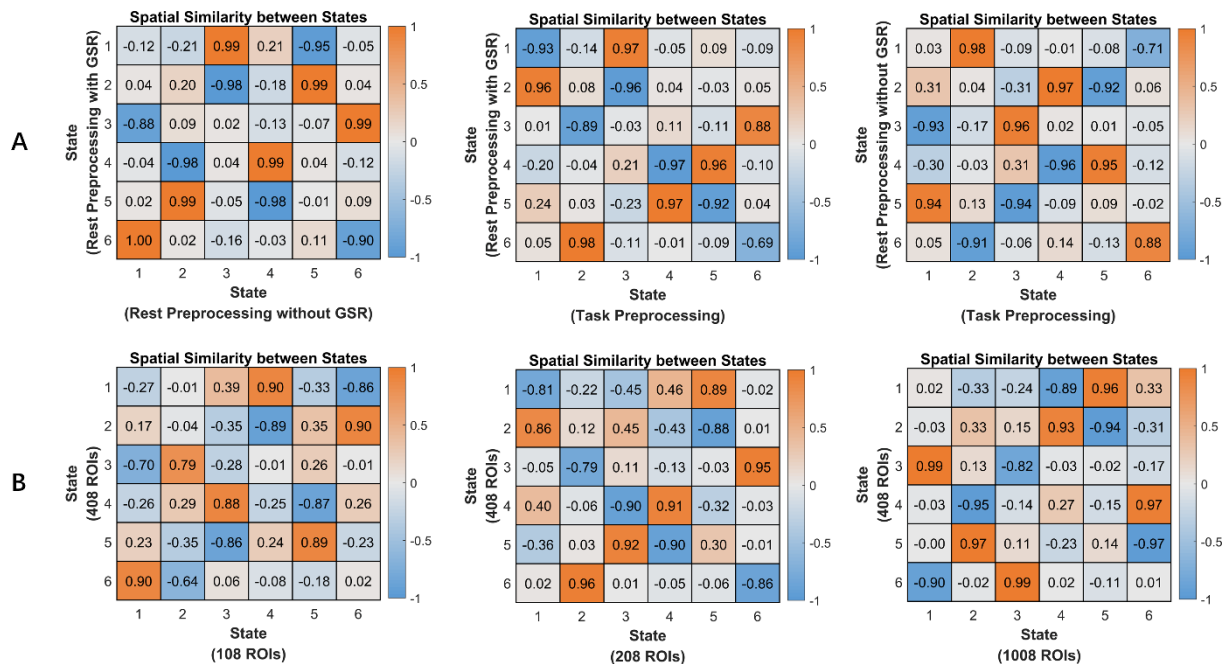

361

362 **Figure 3.** The CAP spatial similarity between states under A) different preprocessing  
 363 pipelines and B) different ROI numbers. The spatial similarity was measured by the Pearson  
 364 correction.

365

### 366 3.2.4. Temporal Reproducibility Evaluation

367 To verify the temporal reproducibility within the HC group more straightforwardly, all  
 368 states were relabeled to group corresponding states together. As shown in Figure 4, the  
 369 absolute values for the CAP metrics across different preprocessing pipelines, ROI numbers

370 and cohorts were evaluated in HC. As for the preprocessing pipeline, rest preprocessing with  
 371 and without GSR showed consistent results across all the three CAP metrics, while task  
 372 preprocessing showed shorter persistence and more counts. All three CAP metrics were not  
 373 sensitive to the ROI number. Different cohorts showed a consistent fraction of time and  
 374 persistence, and the WuXi cohort exhibited more counts than the other two cohorts.  
 375

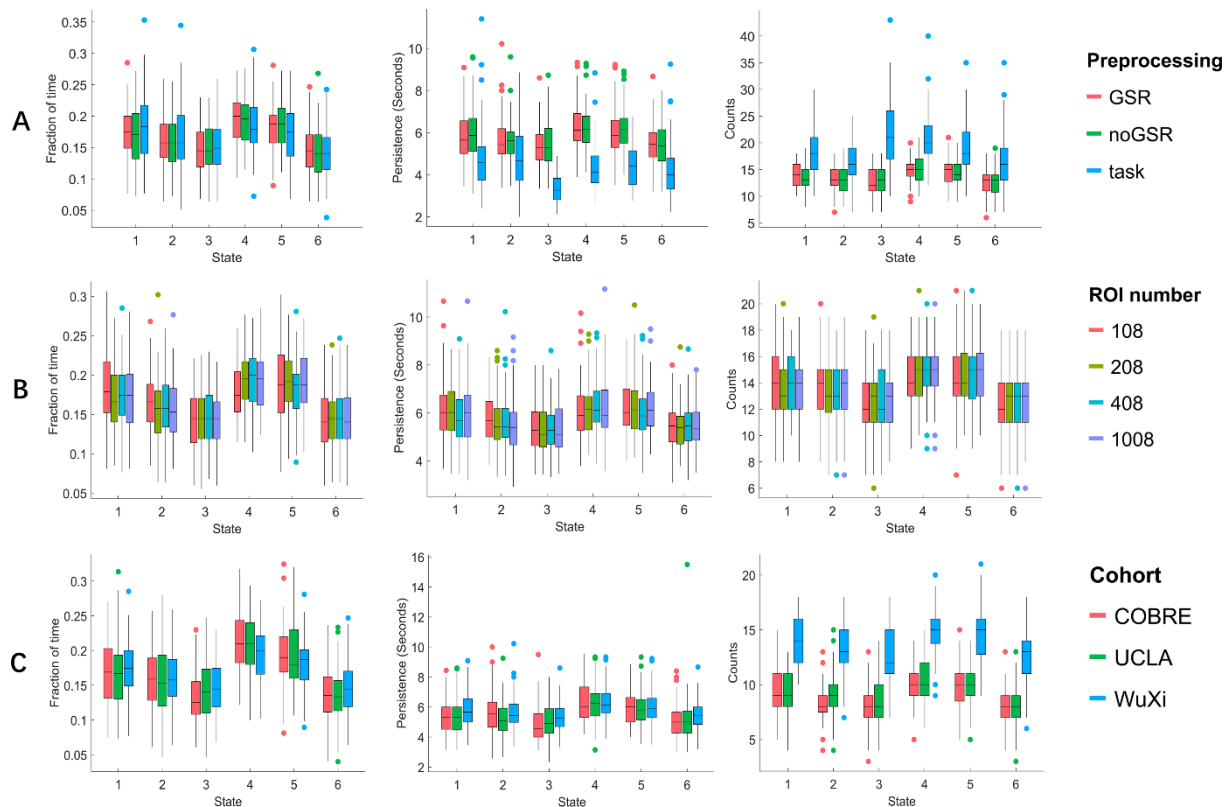

376  
 377 **Figure 4.** The CAP metrics reproducibility within the HC group under different A)  
 378 preprocessing pipelines, B) ROI numbers and C) cohorts.

### 379 3.3. Aberrant and Reproducible State Dynamics in Schizophrenia

#### 380 3.3.1. State Temporal Dynamic Differences between SZ and HC

381 The robust CAP analysis was applied to investigate the schizophrenia-related  
 382 abnormalities in the CAP dynamic state transition across three independent data cohorts. The  
 383 state temporal dynamics (CAP metrics) were compared between SZ patients and well-  
 384 matched HC controls by using a two-sample t-test, with age and gender as covariates. The  
 385 results of group comparisons were presented in Figure 5. As mentioned above, the six CAP  
 386 states could be grouped into three pairs (State 1 and 2, State 3 and 6, State 4 and 5). The mean  
 387 fraction of time of each state for SZ and HC groups was around 15% to 20%, and each state  
 388 persisted for 5 to 6 seconds. For example, the pair of State 4 and State 5 occupied the highest  
 389

390 fraction of time in both the SZ and HC groups, which shared opposite spatial coactivation  
391 patterns dominated by SN, SMN and DMN. Almost every state except State 6 showed  
392 significant temporal dynamic differences ( $P < 0.05$ , FDR corrected). The group differences  
393 were similar within each pair. For instance, SZ patients showed less fraction of time in states  
394 characterized by FPN and DMN (State 1 and State 2), and more fraction of time in states  
395 characterized by SN and DMN (State 4 and State 5).

396 Specifically, SZ patients showed a significantly reduced fraction of time and persistence  
397 in State 1 and 2, as well as reduced counts in State 2, compared with the HC group (Figure  
398 5A). In State 4 and 5, SZ patients had significantly increased fraction of time and counts.  
399 Moreover, SZ patients showed a significantly increased fraction of time and counts in State 3,  
400 but not in State 6. As for the transition probability between CAP states, SZ patients showed  
401 lower transition probability from State 4 to State 2, and lower transition probability within  
402 State 1 and State 2 (Figure 5B). On the other hand, SZ patients showed higher transition  
403 probability from State 1 to State 5, State 2 to State 3, State 3 to State 5 and State 6 to State 4.  
404 The detailed statistic values for these CAP metrics were described in Table S2, Supplementary  
405 material.

406



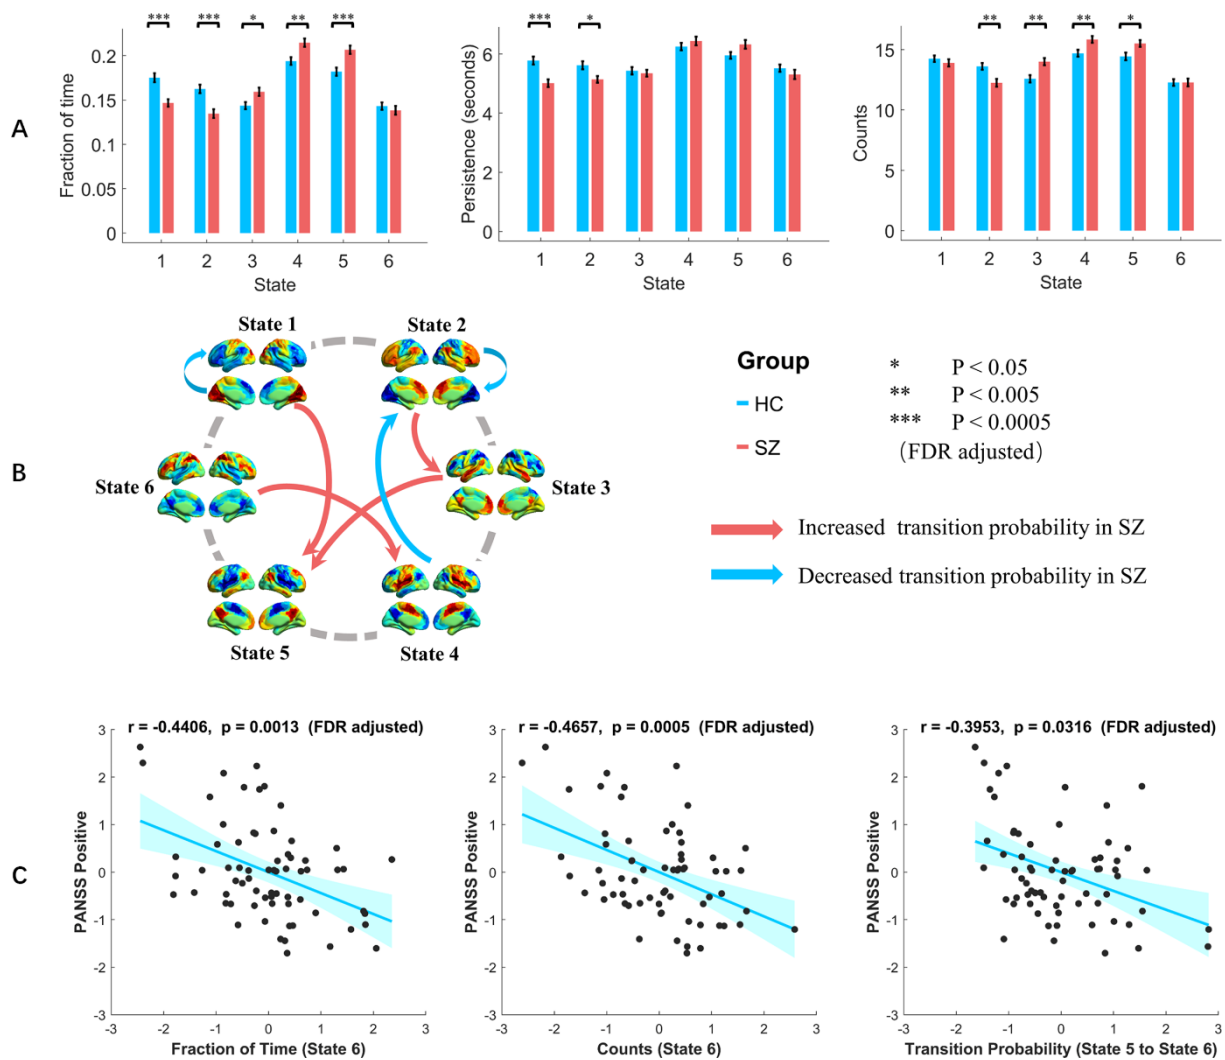

407

408 **Figure 5.** State temporal dynamic differences between SZ and HC. The group differences in  
 409 A) fraction of time, persistence, counts and B) transition probability. Red bins are the SZ  
 410 group and blue bins are the HC group. Two-sample t-tests were performed with age and  
 411 gender as covariates. Error-bar is the standard error. \* indicates  $p < 0.05$ , and \*\* indicates  $p <$   
 412  $0.005$ , and \*\*\* indicates  $p < 0.0005$  with FDR correction. For the transition probability, the  
 413 red arrow means higher transition probability in the SZ group, and vice versa for the blue  
 414 arrow. C) Behavioral relevance with state temporal dynamics in SZ. The fraction of time of  
 415 State 6 was negatively correlated with the positive PANSS score,  $r = -0.4406$ ,  $p = 0.0013$ ; The  
 416 counts of State 6 was negatively correlated with the positive PANSS score,  $r = -0.4657$ ,  $p =$   
 417  $0.0005$ ; The transition probability from State 5 to State 6 was negatively correlated with the  
 418 positive PANSS score,  $r = -0.3953$ ,  $p = 0.0316$  (all the p values were FDR adjusted). The  
 419 shadow represents the 95% confidence interval.

420 Abbreviations: PANSS, Positive and Negative Syndrome Scale.

421

422 *3.3.2. The relationships between State Temporal Dynamics and Clinical Data*

423 The clinical relevance with state temporal dynamics was evaluated in the SZ group,  
424 using partial correlation with age and gender controlled. As shown in Figure 5C, after FDR  
425 correction, the following negative correlations between CAP metrics and positive PANSS  
426 score were found: the fraction of time of State 6 ( $r = -0.4406$ ,  $p = 0.0013$ ), the counts of State  
427 6 ( $r = -0.4657$ ,  $p = 0.0005$ ), and the transition probability from State 5 to State 6 ( $r = -0.3953$ ,  
428  $p = 0.0316$ ). In addition, the persistence of State 3 ( $r = -0.3388$ ,  $p = 0.0323$ ) was negatively  
429 correlated with the disease duration, the fraction of time of State 4 ( $r = 0.3556$ ,  $p = 0.0203$ ),  
430 and the persistence of State 5 ( $r = 0.3653$ ,  $p = 0.0154$ ) was positively correlated with the  
431 PANSS total score.

432

### 433 **3.3.3. Reproducible Group Differences between SZ and HC**

434 The reproducibility of SZ patients' dynamic alterations was also validated in this study,  
435 which confirmed good temporal reproducibility for the group differences. For instance, SZ  
436 showed more fraction of time in State 4 and State 5 and less fraction of time in State 1 and  
437 State 2. These results were consistent across different methodological pipelines (Figure S5  
438 and Figure S8, Supplementary material). And for the unchanged states under  $K = 6$  (State 5)  
439 and  $K = 8$  (State 1), their temporal dynamic differences that SZ showed more fraction of time  
440 than HC were consistent as well (Figure 6B).

441 Figure 7B showed the fraction of time differences between SZ and HC across the three  
442 cohorts. Their overall trend among the six CAP states was similar, particularly State 2, State 3  
443 and State 5 showed consistent significant group differences in the WuXi cohort and COBRE  
444 cohort. Although the temporal dynamic differences obtained from the UCLA cohort were less  
445 similar compared with the other two cohorts, the absolute values still showed a consistent  
446 trend as presented in Figure 5C.

447 In addition, the repeatability for different cohorts was validated. Rather than using the  
448 CAP maps from one cohort to the other cohorts, the CAP analysis was independently  
449 performed for the COBRE and UCLA cohort, and the spatial and temporal results were  
450 compared. Although the repeatability for different cohorts was relatively weaker, considerable  
451 spatial overlaps were identified across the three cohorts. More details were described in  
452 Figure S11 to Figure S13, Supplementary material.

453

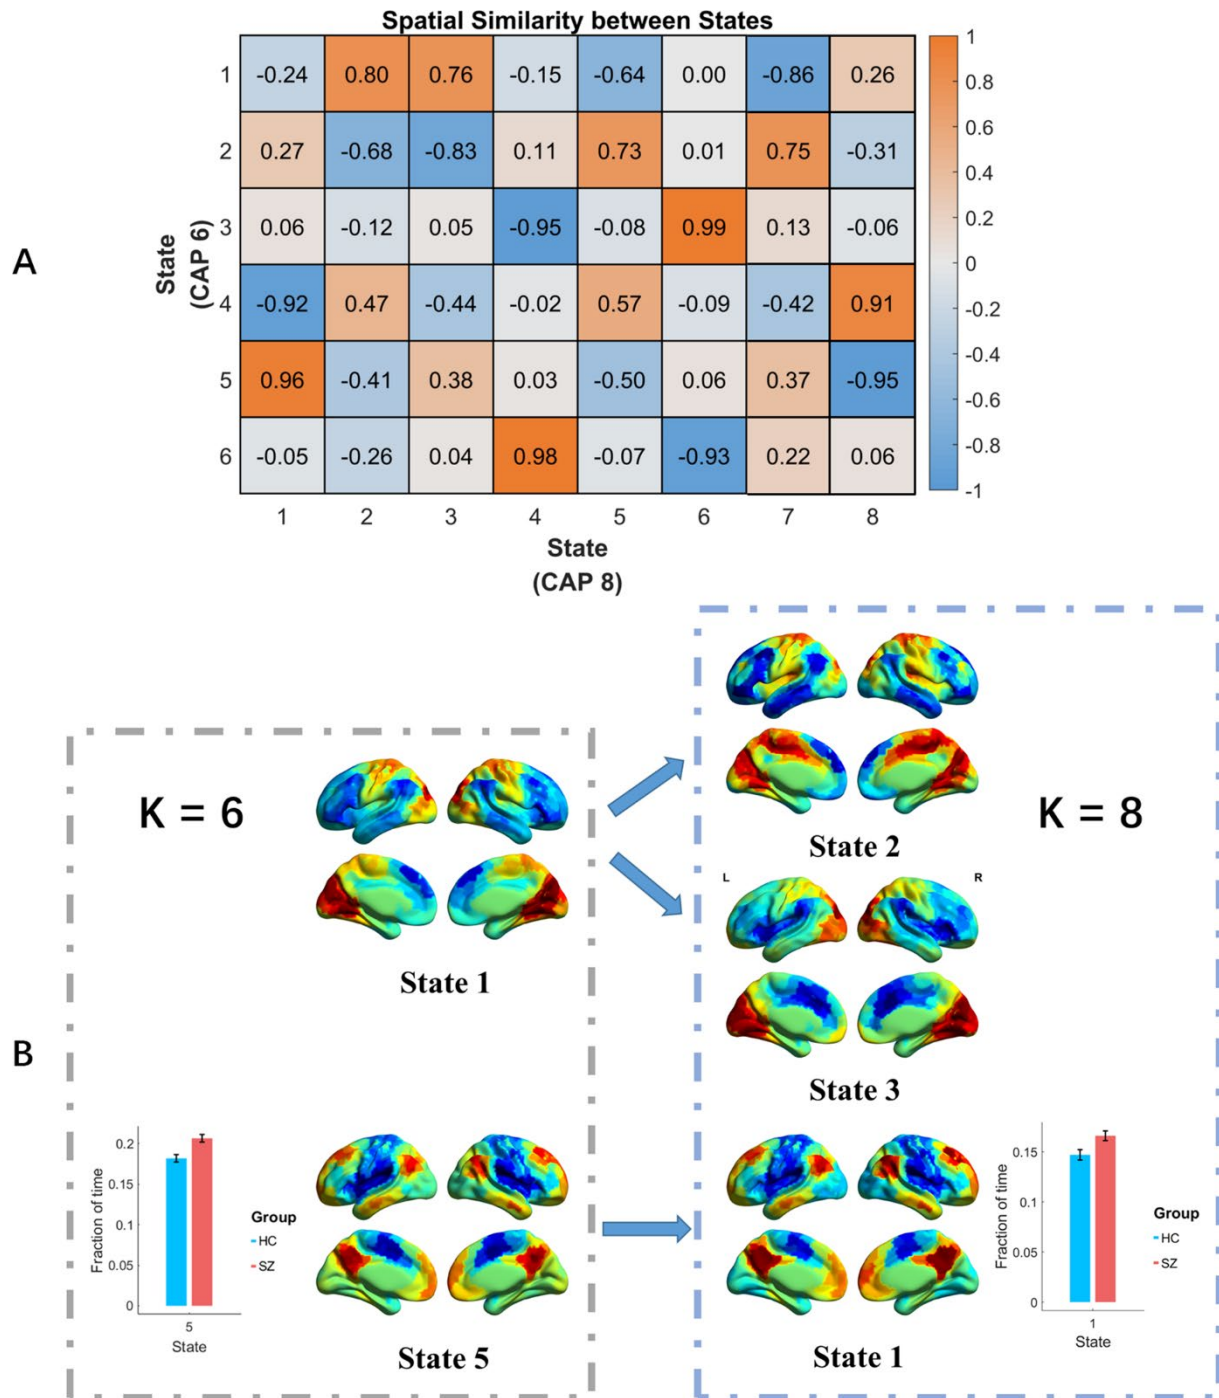

454

455

456

457

458

459

460

461

**Figure 6.** CAP analysis reproducibility with different cluster numbers. In this case, the configuration was WuXi cohort, rest preprocessing with GSR and 408 ROIs. A) The CAP spatial similarity between  $K = 6$  and  $K = 8$ . B) The State 1 in  $K = 6$  was divided into two states in  $K = 8$ , State 2 and State 3. State 5 in  $K = 6$  remained in  $K = 8$ , which corresponds to State 1, and the SZ group also showed a consistent more fraction of time than the HC group. The error bar is the standard error.

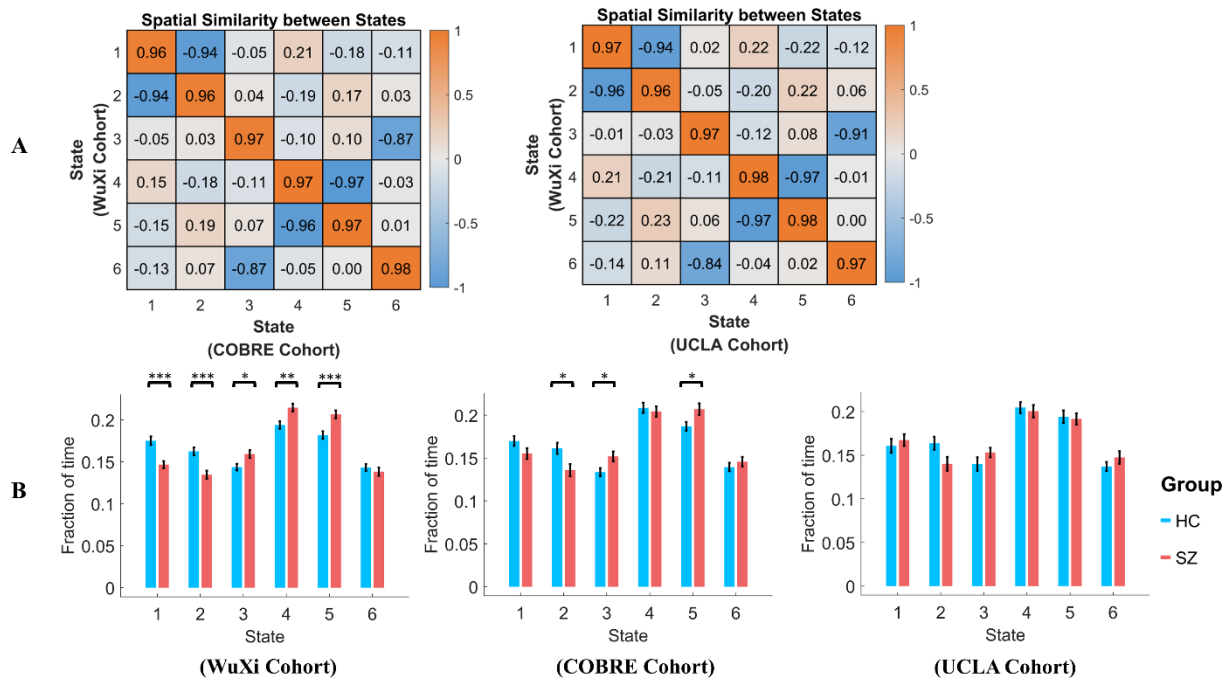

462

463 **Figure 7.** The generalizability of network dynamic measure differences between SZ and HC  
 464 across the three independent cohorts. A) Applying the clustering results based on the WuXi  
 465 cohort to the other two cohorts, their spatial similarity was measured by the Pearson  
 466 correlation. B) The fraction of time differences between SZ and HC across the three cohorts. \*  
 467 indicates  $p < 0.05$ , \*\* indicates  $p < 0.005$  and \*\*\* indicates  $p < 0.005$  (FDR adjusted). The  
 468 error bar is the standard error.

469

#### 470 4. Discussion

471

472

473

474

475

476

477

478

479

480

481

482

483

484

In this study, we first identified the characteristic and reliable states and transitions of functional brain networks in the healthy adults, and then investigated the schizophrenia-related aberrant state dynamics, based on the coactivation pattern analysis and three independent cohorts. Healthy and patient cohorts achieved robust results across different methodological pipelines. Our results revealed six reliable coactivation states of functional brain networks, which were constituted by typical resting-state networks including triple networks as well as primary and other higher-order networks. The principle of spontaneous state transitions inferred the higher spatial similarity, the higher transferring probability between the separable coactivation states. Patients with schizophrenia showed reproducible evidence of aberrant coactivation patterns dynamics, particularly the state dominance such as the fraction of time was altered and associated with positive symptoms in the patients. Together, our study confirms the reproducibility and generalizability of CAP analysis, which could provide meaningful information about the network dysfunction and neuropathological mechanisms in psychiatric disorders.

485

#### 486 **4.1. Coactivation Patterns for Brain States**

487 The CAP analysis is based on the temporal k-means clustering of whole-brain functional  
488 activities, which identifies a group of spatial maps with similar whole-brain coactivation  
489 patterns across the whole scan. Motivated by the idea of PPA (Tagliazucchi et al., 2012), Liu  
490 et al. found that the DMN can be simply identified by averaging multiple distinct  
491 coactivations or co-deactivation patterns at different time points (Liu & Duyn, 2013). Yeo's 7  
492 network parcellation was used in this study, and brain regions belonging to the same network  
493 tended to be activated or deactivated together (Figure 2). This result supports the intrinsic  
494 relationship between brain regions within the same functional network (B. B. Biswal et al.,  
495 2010; Calhoun & Adali, 2012), and these intrinsic networks can be simply extracted by  
496 averaging a few time points rather than using a more complex mathematical method such as  
497 ICA. Thus, while CAP states are derived from resting-state fMRI signals by using not  
498 pairwise functional connectivity but temporal clustering, which we feel at least partly  
499 represents the temporal dynamic characteristics of the whole-brain functional connectome  
500 (Zuo et al., 2012).

501 Previous ICA analyses used to divide the DMN network into anterior part and posterior  
502 part (B. B. Biswal et al., 2010; Zuo et al., 2010). Our results also found the posterior DMN  
503 (mainly includes the precuneus/posterior cingulate cortex and angular gyrus) and the anterior  
504 DMN (mainly includes the medial prefrontal cortex) were activated at different level across  
505 states. The posterior DMN tends to be related to the SN and SMN (State 4 and 5), while the  
506 anterior DMN was associated with FPN and DAN (State 3 and 6). Besides, three pairs of  
507 states were identified with opposite coactivation patterns. For instance, when DMN was  
508 activated, the FPN and DAN were deactivated (State 3), and vice versa is true for State 6. The  
509 phenomenon of opposite CAP pairs has also been found in previous studies (Huang et al.,  
510 2020; Janes et al., 2020; Zhang et al., 2020), suggesting these regions tend to be activated in  
511 an opposite manner that the activation of region A would suppress the activity of another  
512 region B, and vice versa.

513 The DMN is known as the task-negative network. For State 3 to State 6, when DMN was  
514 activated, other task-positive networks such as FPN and SN were either not activated or  
515 deactivated. These results verified the anti-correlation between the task-positive network and  
516 the task-negative network (Fox et al., 2005; Power et al., 2011). Based on CAPs, Li and  
517 colleagues concatenated a set of task activation maps from the Human Connectome Project,  
518 and validated the robust anti-correlated functional network (DMN) across multiple tasks (Li et

519 al., 2020). However, we found that the DMN was not always activated conversely compared  
520 with FPN. Specifically, the medial-prefrontal subsystem and temporal subsystem of DMN  
521 were co-deactivated with FPN when the visual network was activated, and vice versa is true  
522 (State 1 and State 2). This is consistent with recent findings that the DMN and FPN are  
523 coactivated when evaluating internal information (Beaty et al., 2016; Zhu et al., 2017) and  
524 involved in task preparation (Koshino et al., 2011).

525

#### 526 **4.2. Transition Probability and Spatial Similarity**

527 Unlike the Pearson correlation matrix which is mathematically symmetric, the transition  
528 probability between State A and State B is not equal. Nevertheless, a significant positive  
529 correlation was obtained ( $r = 0.8479$ ,  $p < 0.0001$ ) between the transition probability pairs,  
530 suggesting the transition probability between two states is an approximation (Figure 4A). In  
531 addition, the transition probability between two states was significantly correlated with their  
532 spatial similarity ( $r = 0.9817$ ,  $p < 0.0001$ ), which suggests that one state would transfer to the  
533 other state with a higher probability. This positive association was also found by a previous  
534 study based on the hidden Markov model (Vidaurre et al., 2017), as the brain should activate  
535 continuously, it is less likely that one CAP state would directly change to another state with  
536 opposite whole-brain coactivation configuration without any intermediate state.

537

#### 538 **4.3. Reproducibility in CAPs Analysis and Results**

539 In this study, we considered the reproducibility of our analyses from several aspects,  
540 including preprocessing pipeline, ROI number, cluster number and cohort, and they showed  
541 consistent results.

542 For CAP analysis based on resting-state fMRI data, currently there is no standard  
543 preprocessing pipeline. Some studies used the common task preprocessing pipeline, which  
544 mainly includes realignment, spatial normalization and smoothing (Kaiser et al., 2019;  
545 Karahanoglu & Van De Ville, 2015). More studies used the standard resting-state  
546 preprocessing pipeline, which has additional steps such as nuisance signal regression (WM,  
547 CSF) and temporal filtering, with and without GSR (Karahanoglu & Van De Ville, 2015; Liu  
548 et al., 2013; Liu & Duyn, 2013; Ma et al., 2020). We used both the task and resting-state  
549 preprocessing pipelines (with and without GSR) in this study. As shown in Figure 3 and  
550 Figure 4, similar coactivation patterns and temporal dynamics were obtained for different  
551 preprocessing pipelines, which suggests the preprocessing has little effect on the whole-brain  
552 coactivation patterns. Besides, as Figure 4A showed, task preprocessing has shorter

553 persistence and more counts. The reason could be that the high-frequency noise (Chen &  
554 Glover, 2015) was not filtered during the task preprocessing, which causes frequent  
555 fluctuations and shorter persistence.

556 Both voxel-level (Liu et al., 2013) and ROI-level (Janes et al., 2020) were studied in  
557 previous CAP analysis studies. Using ROI could reduce the dimension and save a lot of time  
558 and computational resources (Chen et al., 2015), while it could also decrease the spatial  
559 resolution and ignore spatial details. We chose different ROI numbers from 100, 200, 400 to  
560 1000 to represent multiple levels of ROI size. As shown in Figure 3 and Figure 4, the  
561 coactivation patterns showed highly spatial and temporal dynamics consistency, suggesting  
562 that the CAP analysis is not sensitive to the spatial resolution.

563 As for the cluster number, when increasing the cluster number, the spatial and temporal  
564 properties change continuously. For instance, when K increased from 6 to 8, four states  
565 remained the overall spatial coactivation patterns, and their temporal dynamics were also  
566 unchanged (Figure 6).

567 Besides the analytic variations, we also validated the results obtained from the three  
568 independent cohorts. Although the spatial consistency of coactivation patterns between  
569 cohorts was less than that of different preprocessing steps, there were still considerable spatial  
570 overlaps. To further verify the generalizability of our findings, we mapped the CAP maps  
571 obtained by the WuXi cohort to the other two cohorts, and the group temporal dynamic  
572 differences between SZ and HC were similar across cohorts (Figure 7B). In conclusion, our  
573 study suggested there was considerable reproducibility across different analytic variations and  
574 cohorts.

575

#### 576 **4.4. State Temporal Dynamics Abnormalities in Schizophrenia and Their**

#### 577 **Reproducibility**

578 Using the robust CAP spatial maps, the state temporal dynamics in terms of fraction of  
579 time, persistence, counts, and transition probability were calculated and compared between  
580 SZ and HC groups. Reproducible and aberrant state temporal dynamic was found in  
581 schizophrenia patients concerning different methodological pipelines or cohorts (Figure 5 - 7).  
582 Most CAP states demonstrated aberrant dynamic characteristics, suggesting schizophrenia-  
583 related network dysfunction is widespread over the whole brain, which is consistent with the  
584 accumulating evidence that schizophrenia is characterized by whole-brain network  
585 dysfunction (Adhikari et al., 2019; Collin et al., 2016; Fornito et al., 2012; Kambeitz et al.,  
586 2016; Venkataraman et al., 2012). Previous fMRI studies reported that schizophrenia patients

587 showed distributed alterations in the dynamic functional connectivity (Du et al., 2018),  
588 dynamic brain activity (Fu et al., 2018) and dynamic state (Allen et al., 2014; Damaraju et al.,  
589 2014; Fu et al., 2020; Mennigen et al., 2018; Rashid et al., 2014). A recent resting-state fMRI  
590 study revealed dysregulated brain dynamics, i.e., reduced, less persistent, and more variable  
591 between-network interactions among SN, FPN and DMN in schizophrenia (Supekar et al.,  
592 2019), which proves aberrant triple network saliency model of psychosis (V. J. W. P. Menon,  
593 2020). Our findings extend the current understanding about schizophrenia-related dynamic  
594 abnormalities in such manner that aberrant state temporal dynamics in schizophrenia is  
595 associated with not only triple networks but also part of primary (VN, SMN) and higher-order  
596 networks (DAN).

597 First, we found that SZ patients had insufficiently intensified activation and less inhibited  
598 deactivation in FPN-DMN state, but on the contrary for SN-DMN state, of which the  
599 transition probability changed significantly. It has been well documented that, the triple  
600 networks, involving FPN, SN and DMN, are the cores for higher cognition. Specifically, FPN  
601 is engaged in externally oriented attention during demanding cognitive tasks, SN is crucial in  
602 the process of salience mapping, and DMN is related to self-referential processes (V. Menon,  
603 2011). Imaging findings based on triple network alterations have enhanced our understanding  
604 of the psychopathology in schizophrenia, depression and autism (Krishnadas et al., 2014;  
605 Manoliu et al., 2014; Nekovarova et al., 2014; Supekar et al., 2019; J. Wang et al., 2020).  
606 Recent meta-analysis confirms that the triple network might underlie the common network  
607 dysfunction across psychiatric disorders including schizophrenia (Sha et al., 2019). Although  
608 our findings highlight schizophrenia-related dynamic abnormalities centered in the triple  
609 network, in line with an earlier study (Supekar et al., 2019), our results further point out that  
610 the DMN was continuously activated across all states while SN and FPN were only involved  
611 with specific states, which may suggest the DMN play a crucial role in the state transitions  
612 and cross-network interactions within the triple networks.

613 Second, we found that the robust CAP states were also centered in the primary networks  
614 such as VN and SMN, and higher-order network such as DAN, which had substantially  
615 altered temporal state dynamics in schizophrenia patients. Interestingly, the VN, SMN, and  
616 DAN were recently identified across psychiatric disorders, by partial least squares which is a  
617 different data-driven approach from CAP analysis, as key parts underlying the general  
618 psychopathology, cognitive dysfunction, and impulsivity (Kebets et al., 2019). In this study,  
619 Kebets and colleagues found the latent components of whole-brain resting-state functional  
620 connectivity were robust, and particularly, SMN showed featured alterations in the static



621 resting-state functional connectivity within and between networks. Our study provides  
622 consistent evidence for schizophrenia-related network dysfunction from a new perspective of  
623 CAP states and state transition. Furthermore, we reported that the dynamic characteristics of  
624 the FPN-DAN state (State 6) were negatively correlated with the PANSS positive scores, and  
625 those of SN-DMN state (State 4 and 5) were positively correlated with the PANSS total  
626 scores, consistent with previous evidence (Kindler et al., 2015; Manoliu et al., 2013; Pang et  
627 al., 2017; Rotarska-Jagiela et al., 2010; D. H. Wang et al., 2018). Importantly, the transition  
628 probability from the SN-DMN state (State 5) to the FPN-DAN state (State 6) was also  
629 negatively correlated with the positive PANSS scores. Notably, the group difference was not  
630 significant for State 6 (Figure 5A). This finding may suggest that the state transition is likely  
631 to alleviate the disease severity from the symptom positively-related state to the symptom  
632 negatively-related state, which might provide a potential intervention target for schizophrenia  
633 patients. Taken together, the reproducible abnormalities of state temporal dynamics identified  
634 in this study implicate that schizophrenia is associated with whole-brain functional network  
635 dysregulation and dynamic alterations.

636

#### 637 **4.5. Limitations**

638 Although the k-means clustering has been widely used in fMRI data, currently there is no  
639 optimal criterion to determine the cluster number (Vergara et al., 2020). In this study, the  
640 volume numbers for the WuXi, COBRE and UCLA cohort are 240, 150 and 152 respectively,  
641 with the same TR. When we increased the cluster number in the CAP analysis, the average  
642 volumes allocated to each cluster (state) decreased, which might cause more variability for  
643 each cluster and reduce the clustering stability. In the COBRE and UCLA cohort, we tested  
644 the k-means clustering from 2 to 21, and for  $K = 21$  there are only average 7 volumes for a  
645 single state, which had too limited temporal information. Therefore, we chose the  $K = 6$   
646 following the qualitative but arbitrary criteria in line with the prior study (Liu & Duyn, 2013).

647

#### 648 **5. Conclusion**

649 In summary, functional brain states involved with specific coactivation patterns at  
650 different time points were obtained using coactivation pattern analysis. The spatial and  
651 temporal reproducibility of these CAPs was verified from multiple aspects, such as different  
652 preprocessing pipelines and independent cohorts. Moreover, the robust and aberrant temporal  
653 dynamics were identified in schizophrenia, associated with the severity of clinical symptoms.  
654 This study proved that the CAP analysis has good reproducibility and generalizability, which

655 is useful to provide novel and robust information about aberrant brain dynamic configurations  
656 for understanding the psychopathological mechanisms in schizophrenia.

657

### 658 **Ethics Statement**

659 All participants provided informed written consent. This research was approved by the  
660 respective Universities/Hospitals depending on the origin of the dataset (Medical Ethics  
661 Committee of Wuxi Mental Health Center, Nanjing Medical University for the WuXi cohort,  
662 Institutional Review Boards at UCLA and the Los Angeles County for the UCLA cohort, and  
663 institutional review board protocols of the University of New Mexico for the COBRE cohort).  
664 This study was conducted in accordance with the Declaration of Helsinki guidelines.

665

### 666 **Conflict of Interest**

667 The authors declare no conflict of interest.

668

### 669 **Data and Code Availability Statements**

670 The two open cohorts were obtained from UCLA Consortium for Neuropsychiatric  
671 Phenomics LA5c Study (<https://openneuro.org/datasets/ds000030/versions/1.0.0>) and The  
672 Center for Biomedical Research Excellence (COBRE)  
673 ([http://fcon\\_1000.projects.nitrc.org/indi/retro/cobre.html](http://fcon_1000.projects.nitrc.org/indi/retro/cobre.html)). The WuXi cohort is not publicly  
674 available due to privacy or ethical restrictions. The code that supports the findings of this  
675 study will be made available upon request from the corresponding author.

676

### 677 **Acknowledgements**

678 We thank Robert Bilder, Russell Poldrack and their colleagues for sharing the data  
679 (OpenNEURO). We are grateful to all the patients and volunteers of this study as well as the  
680 staffs at the Wuxi Mental Health Center for their help with participant recruitment and data  
681 collection. This work was supported by the National Natural Science Foundation of China  
682 (NSFC) grant (No. 62071109 to C.M., No. 81871081 and 81301148 to L.T., No. 61871420 to  
683 B.B.,).

684

## 685 References

- 686 Adhikari, B. M., Hong, L. E., Sampath, H., Chiappelli, J., Jahanshad, N., Thompson, P. M., et  
687 al. (2019). Functional network connectivity impairments and core cognitive deficits in  
688 schizophrenia. *Hum Brain Mapp*, *40*(16), 4593-4605. doi:10.1002/hbm.24723
- 689 Allen, E. A., Damaraju, E., Plis, S. M., Erhardt, E. B., Eichele, T., & Calhoun, V. D. (2014).  
690 Tracking Whole-Brain Connectivity Dynamics in the Resting State. *Cerebral Cortex*,  
691 *24*(3), 663-676. doi:10.1093/cercor/bhs352
- 692 Aurich, N. K., Alves Filho, J. O., Marques da Silva, A. M., & Franco, A. R. (2015).  
693 Evaluating the reliability of different preprocessing steps to estimate graph theoretical  
694 measures in resting state fMRI data. *Front Neurosci*, *9*, 48.  
695 doi:10.3389/fnins.2015.00048
- 696 Beaty, R. E., Benedek, M., Silvia, P. J., & Schacter, D. L. (2016). Creative Cognition and  
697 Brain Network Dynamics. *Trends Cogn Sci*, *20*(2), 87-95.  
698 doi:10.1016/j.tics.2015.10.004
- 699 Biswal, B., Yetkin, F. Z., Haughton, V. M., & Hyde, J. S. (1995). Functional Connectivity in  
700 the Motor Cortex of Resting Human Brain Using Echo-Planar Mri. *Magnetic  
701 Resonance in Medicine*, *34*(4), 537-541. doi:DOI 10.1002/mrm.1910340409
- 702 Biswal, B. B., Mennes, M., Zuo, X. N., Gohel, S., Kelly, C., Smith, S. M., et al. (2010).  
703 Toward discovery science of human brain function. *Proc Natl Acad Sci U S A*,  
704 *107*(10), 4734-4739. doi:10.1073/pnas.0911855107
- 705 Botvinik-Nezer, R., Holzmeister, F., Camerer, C. F., Dreber, A., Huber, J., Johannesson, M., et  
706 al. (2020). Variability in the analysis of a single neuroimaging dataset by many teams.  
707 *Nature*, *582*(7810), 84-88. doi:10.1038/s41586-020-2314-9
- 708 Bowring, A., Maumet, C., & Nichols, T. E. (2019). Exploring the impact of analysis software  
709 on task fMRI results. *Hum Brain Mapp*, *40*(11), 3362-3384. doi:10.1002/hbm.24603
- 710 Calhoun, V. D., & Adali, T. (2012). Multisubject independent component analysis of fMRI: a  
711 decade of intrinsic networks, default mode, and neurodiagnostic discovery. *IEEE Rev  
712 Biomed Eng*, *5*, 60-73. doi:10.1109/RBME.2012.2211076
- 713 Chen, J. E., Chang, C., Greicius, M. D., & Glover, G. H. (2015). Introducing co-activation  
714 pattern metrics to quantify spontaneous brain network dynamics. *Neuroimage*, *111*,  
715 476-488. doi:10.1016/j.neuroimage.2015.01.057
- 716 Chen, J. E., & Glover, G. H. (2015). BOLD fractional contribution to resting-state functional  
717 connectivity above 0.1 Hz. *Neuroimage*, *107*, 207-218.  
718 doi:10.1016/j.neuroimage.2014.12.012
- 719 Collin, G., Turk, E., & van den Heuvel, M. P. (2016). Connectomics in Schizophrenia: From  
720 Early Pioneers to Recent Brain Network Findings. *Biol Psychiatry Cogn Neurosci  
721 Neuroimaging*, *1*(3), 199-208. doi:10.1016/j.bpsc.2016.01.002
- 722 Damaraju, E., Allen, E. A., Belger, A., Ford, J. M., McEwen, S., Mathalon, D. H., et al.  
723 (2014). Dynamic functional connectivity analysis reveals transient states of  
724 dysconnectivity in schizophrenia. *Neuroimage Clin*, *5*, 298-308.  
725 doi:10.1016/j.nicl.2014.07.003
- 726 Di, X., & Biswal, B. B. (2015). Characterizations of resting-state modulatory interactions in  
727 the human brain. *J Neurophysiol*, *114*(5), 2785-2796. doi:10.1152/jn.00893.2014
- 728 Du, Y., Fryer, S. L., Fu, Z., Lin, D., Sui, J., Chen, J., et al. (2018). Dynamic functional  
729 connectivity impairments in early schizophrenia and clinical high-risk for psychosis.  
730 *Neuroimage*, *180*(Pt B), 632-645. doi:10.1016/j.neuroimage.2017.10.022
- 731 Eklund, A., Nichols, T. E., & Knutsson, H. (2016). Cluster failure: Why fMRI inferences for  
732 spatial extent have inflated false-positive rates. *Proceedings of the National Academy  
733 of Sciences of the United States of America*, *113*(28), 7900-7905.  
734 doi:10.1073/pnas.1602413113

- 735 Esteban, O., Markiewicz, C. J., Blair, R. W., Moodie, C. A., Isik, A. I., Erramuzpe, A., et al.  
736 (2019). fMRIPrep: a robust preprocessing pipeline for functional MRI. *Nat Methods*,  
737 *16*(1), 111-116. doi:10.1038/s41592-018-0235-4
- 738 Fong, A. H. C., Yoo, K., Rosenberg, M. D., Zhang, S., Li, C. S. R., Scheinost, D., et al.  
739 (2019). Dynamic functional connectivity during task performance and rest predicts  
740 individual differences in attention across studies. *Neuroimage*, *188*, 14-25.  
741 doi:10.1016/j.neuroimage.2018.11.057
- 742 Fornito, A., Zalesky, A., Pantelis, C., & Bullmore, E. T. (2012). Schizophrenia, neuroimaging  
743 and connectomics. *Neuroimage*, *62*(4), 2296-2314.  
744 doi:10.1016/j.neuroimage.2011.12.090
- 745 Fox, M. D., Snyder, A. Z., Vincent, J. L., Corbetta, M., Van Essen, D. C., & Raichle, M. E.  
746 (2005). The human brain is intrinsically organized into dynamic, anticorrelated  
747 functional networks. *Proceedings of the National Academy of Sciences of the United*  
748 *States of America*, *102*(27), 9673-9678. doi:10.1073/pnas.0504136102
- 749 Freitas, L. G. A., Bolton, T. A. W., Krikler, B. E., Jochaut, D., Giraud, A. L., Huppi, P. S., et  
750 al. (2020). Time-resolved effective connectivity in task fMRI: Psychophysiological  
751 interactions of Co-Activation patterns. *Neuroimage*, *212*, 116635.  
752 doi:10.1016/j.neuroimage.2020.116635
- 753 Friston, K. J. (2011). Functional and effective connectivity: a review. *Brain Connect*, *1*(1), 13-  
754 36. doi:10.1089/brain.2011.0008
- 755 Fu, Z., Iraj, A., Turner, J. A., Sui, J., Miller, R., Pearlson, G. D., et al. (2020). Dynamic state  
756 with covarying brain activity-connectivity: On the pathophysiology of schizophrenia.  
757 *Neuroimage*, *224*, 117385. doi:10.1016/j.neuroimage.2020.117385
- 758 Fu, Z., Tu, Y., Di, X., Du, Y., Pearlson, G. D., Turner, J. A., et al. (2018). Characterizing  
759 dynamic amplitude of low-frequency fluctuation and its relationship with dynamic  
760 functional connectivity: An application to schizophrenia. *Neuroimage*, *180*(Pt B), 619-  
761 631. doi:10.1016/j.neuroimage.2017.09.035
- 762 Gonzalez-Castillo, J., & Bandettini, P. A. (2018). Task-based dynamic functional connectivity:  
763 Recent findings and open questions. *Neuroimage*, *180*(Pt B), 526-533.  
764 doi:10.1016/j.neuroimage.2017.08.006
- 765 Huang, Z., Zhang, J., Wu, J., Mashour, G. A., & Hudetz, A. G. (2020). Temporal circuit of  
766 macroscale dynamic brain activity supports human consciousness. *Sci Adv*, *6*(11),  
767 eaaz0087. doi:10.1126/sciadv.aaz0087
- 768 Hunt, M. J., Kopell, N. J., Traub, R. D., & Whittington, M. A. (2017). Aberrant Network  
769 Activity in Schizophrenia. *Trends Neurosci*, *40*(6), 371-382.  
770 doi:10.1016/j.tins.2017.04.003
- 771 Hutchison, R. M., Womelsdorf, T., Allen, E. A., Bandettini, P. A., Calhoun, V. D., Corbetta,  
772 M., et al. (2013). Dynamic functional connectivity: Promise, issues, and  
773 interpretations. *Neuroimage*, *80*, 360-378. doi:10.1016/j.neuroimage.2013.05.079
- 774 Janes, A. C., Peechatka, A. L., Frederick, B. B., & Kaiser, R. H. (2020). Dynamic functioning  
775 of transient resting-state coactivation networks in the Human Connectome Project.  
776 *Hum Brain Mapp*, *41*(2), 373-387. doi:10.1002/hbm.24808
- 777 Kaiser, R. H., Kang, M. S., Lew, Y., Van Der Feen, J., Aguirre, B., Clegg, R., et al. (2019).  
778 Abnormal fronto-insular-default network dynamics in adolescent depression and  
779 rumination: a preliminary resting-state co-activation pattern analysis.  
780 *Neuropsychopharmacology*, *44*(9), 1604-1612. doi:10.1038/s41386-019-0399-3
- 781 Kambeitz, J., Kambeitz-Ilankovic, L., Cabral, C., Dwyer, D. B., Calhoun, V. D., van den  
782 Heuvel, M. P., et al. (2016). Aberrant Functional Whole-Brain Network Architecture in  
783 Patients With Schizophrenia: A Meta-analysis. *Schizophr Bull*, *42 Suppl 1*, S13-21.  
784 doi:10.1093/schbul/sbv174

- 785 Karahanoglu, F. I., & Van De Ville, D. (2015). Transient brain activity disentangles fMRI  
786 resting-state dynamics in terms of spatially and temporally overlapping networks.  
787 *Nature Communications*, 6, 7751. doi:10.1038/ncomms8751
- 788 Kebets, V., Holmes, A. J., Orban, C., Tang, S., Li, J., Sun, N., et al. (2019). Somatosensory-  
789 Motor Dysconnectivity Spans Multiple Transdiagnostic Dimensions of  
790 Psychopathology. *Biol Psychiatry*, 86(10), 779-791.  
791 doi:10.1016/j.biopsych.2019.06.013
- 792 Kindler, J., Jann, K., Homan, P., Hauf, M., Walther, S., Strik, W., et al. (2015). Static and  
793 Dynamic Characteristics of Cerebral Blood Flow During the Resting State in  
794 Schizophrenia. *Schizophrenia Bulletin*, 41(1), 163-170. doi:10.1093/schbul/sbt180
- 795 Koshino, H., Minamoto, T., Ikeda, T., Osaka, M., Otsuka, Y., & Osaka, N. (2011). Anterior  
796 medial prefrontal cortex exhibits activation during task preparation but deactivation  
797 during task execution. *Plos One*, 6(8), e22909. doi:10.1371/journal.pone.0022909
- 798 Krishnadas, R., Ryali, S., Chen, T., Uddin, L., Supekar, K., Palaniyappan, L., et al. (2014).  
799 Resting state functional hyperconnectivity within a triple network model in paranoid  
800 schizophrenia. *Lancet*, 383, 65-65.
- 801 Li, M., Dahmani, L., Wang, D., Ren, J., Stocklein, S., Lin, Y., et al. (2020). Co-activation  
802 patterns across multiple tasks reveal robust anti-correlated functional networks.  
803 *Neuroimage*, 227, 117680. doi:10.1016/j.neuroimage.2020.117680
- 804 Liu, X., Chang, C., & Duyn, J. H. (2013). Decomposition of spontaneous brain activity into  
805 distinct fMRI co-activation patterns. *Front Syst Neurosci*, 7, 101.  
806 doi:10.3389/fnsys.2013.00101
- 807 Liu, X., & Duyn, J. H. (2013). Time-varying functional network information extracted from  
808 brief instances of spontaneous brain activity. *Proc Natl Acad Sci U S A*, 110(11), 4392-  
809 4397. doi:10.1073/pnas.1216856110
- 810 Ma, X., Zhuo, Z., Wei, L., Ma, Z., Li, Z., Li, H., et al. (2020). Altered Temporal Organization  
811 of Brief Spontaneous Brain Activities in Patients with Alzheimer's Disease.  
812 *Neuroscience*, 425, 1-11. doi:10.1016/j.neuroscience.2019.11.025
- 813 Manoliu, A., Riedl, V., Doll, A., Bauml, J. G., Muhlau, M., Schwerthoffer, D., et al. (2013).  
814 Insular Dysfunction Reflects Altered Between-Network Connectivity and Severity of  
815 Negative Symptoms in Schizophrenia during Psychotic Remission. *Front Hum*  
816 *Neurosci*, 7, 216. doi:10.3389/fnhum.2013.00216
- 817 Manoliu, A., Riedl, V., Zherdin, A., Muhlau, M., Schwerthoffer, D., Scherr, M., et al. (2014).  
818 Aberrant dependence of default mode/central executive network interactions on  
819 anterior insular salience network activity in schizophrenia. *Schizophr Bull*, 40(2), 428-  
820 437. doi:10.1093/schbul/sbt037
- 821 Mennigen, E., Miller, R. L., Rashid, B., Fryer, S. L., Loewy, R. L., Stuart, B. K., et al. (2018).  
822 Reduced higher-dimensional resting state fMRI dynamism in clinical high-risk  
823 individuals for schizophrenia identified by meta-state analysis. *Schizophrenia*  
824 *Research*, 201, 217-223. doi:10.1016/j.schres.2018.06.007
- 825 Menon, V. (2011). Large-scale brain networks and psychopathology: a unifying triple network  
826 model. *Trends Cogn Sci*, 15(10), 483-506. doi:10.1016/j.tics.2011.08.003
- 827 Menon, V. J. W. P. (2020). Brain networks and cognitive impairment in psychiatric disorders.  
828 *19(3)*, 309.
- 829 Nekovarova, T., Fajnerova, I., Horacek, J., & Spaniel, F. (2014). Bridging disparate symptoms  
830 of schizophrenia: a triple network dysfunction theory. *Front Behav Neurosci*, 8, 171.  
831 doi:10.3389/fnbeh.2014.00171
- 832 Pang, L. J., Kennedy, D., Wei, Q. L., Lv, L. X., Gao, J. S., Li, H., et al. (2017). Decreased  
833 Functional Connectivity of Insular Cortex in Drug Naive First Episode Schizophrenia:  
834 In Relation to Symptom Severity. *Plos One*, 12(1). doi:ARTN e0167242  
835 10.1371/journal.pone.0167242

- 836 Power, J. D., Cohen, A. L., Nelson, S. M., Wig, G. S., Barnes, K. A., Church, J. A., et al.  
837 (2011). Functional Network Organization of the Human Brain. *Neuron*, 72(4), 665-  
838 678. doi:10.1016/j.neuron.2011.09.006
- 839 Preti, M. G., Bolton, T. A. W., & Van De Ville, D. (2017). The dynamic functional  
840 connectome: State-of-the-art and perspectives. *Neuroimage*, 160, 41-54.  
841 doi:10.1016/j.neuroimage.2016.12.061
- 842 Rashid, B., Damaraju, E., Pearlson, G. D., & Calhoun, V. D. (2014). Dynamic connectivity  
843 states estimated from resting fMRI Identify differences among Schizophrenia, bipolar  
844 disorder, and healthy control subjects. *Frontiers in Human Neuroscience*, 8. doi:ARTN  
845 897  
846 10.3389/fnhum.2014.00897
- 847 Rotarska-Jagiela, A., van de Ven, V., Oertel-Knochel, V., Uhlhaas, P. J., Vogeley, K., &  
848 Linden, D. E. J. (2010). Resting-state functional network correlates of psychotic  
849 symptoms in schizophrenia. *Schizophrenia Research*, 117(1), 21-30.  
850 doi:10.1016/j.schres.2010.01.001
- 851 Rousseeuw, P. J. (1987). Silhouettes: a graphical aid to the interpretation and validation of  
852 cluster analysis. *Journal of Computational and Applied Mathematics*, 20(1), 53-65.
- 853 Schaefer, A., Kong, R., Gordon, E. M., Laumann, T. O., Zuo, X. N., Holmes, A. J., et al.  
854 (2018). Local-Global Parcellation of the Human Cerebral Cortex from Intrinsic  
855 Functional Connectivity MRI. *Cereb Cortex*, 28(9), 3095-3114.  
856 doi:10.1093/cercor/bhx179
- 857 Sha, Z., Wager, T. D., Mechelli, A., & He, Y. (2019). Common Dysfunction of Large-Scale  
858 Neurocognitive Networks Across Psychiatric Disorders. *Biol Psychiatry*, 85(5), 379-  
859 388. doi:10.1016/j.biopsych.2018.11.011
- 860 Shirer, W. R., Jiang, H., Price, C. M., Ng, B., & Greicius, M. D. (2015). Optimization of rs-  
861 fMRI Pre-processing for Enhanced Signal-Noise Separation, Test-Retest Reliability,  
862 and Group Discrimination. *Neuroimage*, 117, 67-79.  
863 doi:10.1016/j.neuroimage.2015.05.015
- 864 Smith, S. M., Miller, K. L., Moeller, S., Xu, J., Auerbach, E. J., Woolrich, M. W., et al. (2012).  
865 Temporally-independent functional modes of spontaneous brain activity. *Proc Natl*  
866 *Acad Sci U S A*, 109(8), 3131-3136. doi:10.1073/pnas.1121329109
- 867 Strother, S. C. (2006). Evaluating fMRI preprocessing pipelines - Review of preprocessing  
868 steps for BOLD fMRI. *Ieee Engineering in Medicine and Biology Magazine*, 25(2),  
869 27-41. doi:Doi 10.1109/Memb.2006.1607667
- 870 Supekar, K., Cai, W., Krishnadas, R., Palaniyappan, L., & Menon, V. (2019). Dysregulated  
871 Brain Dynamics in a Triple-Network Saliency Model of Schizophrenia and Its  
872 Relation to Psychosis. *Biol Psychiatry*, 85(1), 60-69.  
873 doi:10.1016/j.biopsych.2018.07.020
- 874 Tagliazucchi, E., Balenzuela, P., Fraiman, D., & Chialvo, D. R. (2012). Criticality in large-  
875 scale brain FMRI dynamics unveiled by a novel point process analysis. *Front Physiol*,  
876 3, 15. doi:10.3389/fphys.2012.00015
- 877 Tian, L., Meng, C., Jiang, Y., Tang, Q., Wang, S., Xie, X., et al. (2016). Abnormal functional  
878 connectivity of brain network hubs associated with symptom severity in treatment-  
879 naive patients with obsessive-compulsive disorder: A resting-state functional MRI  
880 study. 66, 104-111.
- 881 Tzourio-Mazoyer, N., Landeau, B., Papathanassiou, D., Crivello, F., Etard, O., Delcroix, N.,  
882 et al. (2002). Automated anatomical labeling of activations in SPM using a  
883 macroscopic anatomical parcellation of the MNI MRI single-subject brain.  
884 *Neuroimage*, 15(1), 273-289. doi:10.1006/nimg.2001.0978

- 885 Venkataraman, A., Whitford, T. J., Westin, C. F., Golland, P., & Kubicki, M. (2012). Whole  
886 brain resting state functional connectivity abnormalities in schizophrenia.  
887 *Schizophrenia Research*, *139*(1-3), 7-12. doi:10.1016/j.schres.2012.04.021
- 888 Vergara, V. M., Mayer, A. R., Damaraju, E., Hutchison, K., & Calhoun, V. D. (2017). The  
889 effect of preprocessing pipelines in subject classification and detection of abnormal  
890 resting state functional network connectivity using group ICA. *Neuroimage*, *145*, 365-  
891 376. doi:10.1016/j.neuroimage.2016.03.038
- 892 Vergara, V. M., Salman, M., Abrol, A., Espinoza, F. A., & Calhoun, V. D. (2020). Determining  
893 the number of states in dynamic functional connectivity using cluster validity indexes.  
894 *Journal of Neuroscience Methods*, *337*. doi:ARTN 108651  
895 10.1016/j.jneumeth.2020.108651
- 896 Vidaurre, D., Quinn, A. J., Baker, A. P., Dupret, D., Tejero-Cantero, A., & Woolrich, M. W.  
897 (2016). Spectrally resolved fast transient brain states in electrophysiological data.  
898 *Neuroimage*, *126*, 81-95. doi:10.1016/j.neuroimage.2015.11.047
- 899 Vidaurre, D., Smith, S. M., & Woolrich, M. W. (2017). Brain network dynamics are  
900 hierarchically organized in time. *Proc Natl Acad Sci U S A*, *114*(48), 12827-12832.  
901 doi:10.1073/pnas.1705120114
- 902 Wang, D. H., Li, M. L., Wang, M. Y., Schoeppe, F., Ren, J. X., Chen, H. F., et al. (2018).  
903 Individual-specific functional connectivity markers track dimensional and categorical  
904 features of psychotic illness (vol 25, 2119, 2020). *Molecular Psychiatry*, *25*(9), 2200-  
905 2200. doi:10.1038/s41380-018-0340-x
- 906 Wang, J., Wang, Y., Huang, H., Jia, Y., Zheng, S., Zhong, S., et al. (2020). Abnormal dynamic  
907 functional network connectivity in unmedicated bipolar and major depressive  
908 disorders based on the triple-network model. *Psychol Med*, *50*(3), 465-474.  
909 doi:10.1017/S003329171900028X
- 910 Yeo, B. T., Krienen, F. M., Sepulcre, J., Sabuncu, M. R., Lashkari, D., Hollinshead, M., et al.  
911 (2011). The organization of the human cerebral cortex estimated by intrinsic  
912 functional connectivity. *J Neurophysiol*, *106*(3), 1125-1165.  
913 doi:10.1152/jn.00338.2011
- 914 Zalesky, A., Fornito, A., Cocchi, L., Gollo, L. L., & Breakspear, M. (2014). Time-resolved  
915 resting-state brain networks. *Proc Natl Acad Sci U S A*, *111*(28), 10341-10346.  
916 doi:10.1073/pnas.1400181111
- 917 Zhang, J., Huang, Z., Tumati, S., & Northoff, G. (2020). Rest-task modulation of fMRI-  
918 derived global signal topography is mediated by transient coactivation patterns. *PLoS*  
919 *Biol*, *18*(7), e3000733. doi:10.1371/journal.pbio.3000733
- 920 Zhu, W., Chen, Q., Xia, L., Beaty, R. E., Yang, W., Tian, F., et al. (2017). Common and  
921 distinct brain networks underlying verbal and visual creativity. *Hum Brain Mapp*,  
922 *38*(4), 2094-2111. doi:10.1002/hbm.23507
- 923 Zuo, X. N., Biswal, B. B., & Poldrack, R. A. (2019). Editorial: Reliability and Reproducibility  
924 in Functional Connectomics. *Front Neurosci*, *13*, 117. doi:10.3389/fnins.2019.00117
- 925 Zuo, X. N., Ehmke, R., Mennes, M., Imperati, D., Castellanos, F. X., Sporns, O., et al. (2012).  
926 Network centrality in the human functional connectome. *Cereb Cortex*, *22*(8), 1862-  
927 1875. doi:10.1093/cercor/bhr269
- 928 Zuo, X. N., Kelly, C., Adelstein, J. S., Klein, D. F., Castellanos, F. X., & Milham, M. P.  
929 (2010). Reliable intrinsic connectivity networks: Test-retest evaluation using ICA and  
930 dual regression approach. *Neuroimage*, *49*(3), 2163-2177.  
931 doi:10.1016/j.neuroimage.2009.10.080  
932
